# 1 Investigating how *Salmonella* colonise alfalfa using a whole genome screen.

2

3 Emma R. Holden <sup>1</sup>, Haider Al-Khanaq<sup>1</sup>, Noémie Vimont<sup>1</sup>, Mark A. Webber <sup>1,2</sup> and Eleftheria  
4 Trampari <sup>1\*</sup>

5

6 <sup>1</sup> Quadram Institute Bioscience, Norwich Research Park, Norwich, Norfolk, NR4 7UQ, U.K.

7 <sup>2</sup> Norwich Medical School, University of East Anglia, Norwich Research Park, Norwich,  
8 Norfolk, NR4 7TJ, U.K.

9

10 \* Corresponding author: Eleftheria Trampari [Eleftheria.Trampari@quadram.ac.uk](mailto:Eleftheria.Trampari@quadram.ac.uk)

11

12 Keywords: TraDIS, foodborne pathogens, fresh produce, *Salmonella*, functional genomics,  
13 food safety

14

## 15 Abstract

16 Enteropathogenic bacteria including *Salmonella* regularly cause outbreaks of infection from  
17 fresh produce posing a significant public health threat. *Salmonella*'s ability to persist on fresh  
18 produce for extended periods is partly attributed to its capacity to form biofilms, which poses  
19 a challenge to food decontamination and facilitates persistence in the food chain. Preventing  
20 biofilm formation on food products and in food processing environments is crucial for  
21 reducing the incidence of foodborne diseases. Understanding the mechanisms of  
22 colonisation and establishment on fresh produce will inform the development of  
23 decontamination approaches. We used Transposon-directed Insertion site sequencing  
24 (TraDIS-*Xpress*) to investigate the mechanisms employed by *Salmonella* enterica serovar  
25 Typhimurium to colonise and establish itself on fresh produce at critical timepoints following  
26 infection. We established an alfalfa infection model and compared the findings to those  
27 obtained from glass surfaces. Our research revealed dynamic changes in the pathways  
28 associated with biofilm formation over time, with distinct plant-specific and glass-specific  
29 mechanisms for biofilm formation, alongside the identification of shared genes playing  
30 pivotal roles in both contexts. Notably, we observed variations in the significance of factors  
31 such as flagella biosynthesis, lipopolysaccharide (LPS) production, and stringent response  
32 regulation in biofilm development on plant versus glass surfaces. Understanding the genetic  
33 underpinnings of biofilm formation on both biotic and abiotic surfaces offers valuable insights  
34 that can inform the development of targeted antibacterial therapeutics, ultimately enhancing  
35 food safety throughout the food processing chain.

36 **Funding**

37 The authors gratefully acknowledge the support of the Biotechnology and Biological  
38 Sciences Research Council (BBSRC); ERH, JAA, HAK, MAW and ET were supported by the  
39 BBSRC Institute Strategic Programme Microbes and Food Safety BB/X011011/1 and its  
40 constituent project BBS/E/F/000PR13635. NV was supported by the Food Safety Research  
41 Network grant BB/X002985/1 awarded to ET.

42

43 **Data availability**

44 Nucleotide sequence data supporting the analysis in this study has been deposited in  
45 ArrayExpress under the accession number E-MTAB-13495. The authors confirm all  
46 supporting data, code and protocols have been provided within the article or through  
47 supplementary data files.

## 48 **Introduction**

49 Enteropathogenic bacteria present an evolving threat to public health. Historically, these  
50 pathogens were predominantly linked to meat products. However, in recent years, fresh  
51 produce is emerging as a major source of these outbreaks, being implicated in over a third of  
52 reported outbreaks in certain countries (Brennan et al., 2022). The majority of these  
53 outbreaks are associated with ready-to-eat crops, although some cases have been attributed  
54 to the mishandling of vegetables that are typically subjected to cooking processes (Launders  
55 et al., 2016). Certain human pathogens, such as *Salmonella*, are able to colonise various  
56 ecological niches and survive outside their primary host (Humphrey, 2004). *S. enterica* has  
57 been implicated in numerous recent multistate outbreaks in the USA associated with  
58 contaminated fruits and vegetables, including lettuce, tomatoes, alfalfa, cucumbers, and  
59 melons (Heaton and Jones, 2008, EFSA et al., 2017). Recent studies have demonstrated  
60 *Salmonella's* ability to actively colonise plant tissues employing specific mechanisms  
61 (Salazar et al., 2013) and *Salmonella* has been found to persist in produce for extended  
62 periods, with viability lasting over six months (Islam et al., 2004).

63

64 *Salmonella's* adaptive strategy to persist in the challenging plant environment includes the  
65 formation of biofilms. Biofilms are structured, aggregated communities of microorganisms  
66 encased in an extracellular matrix and attached to surfaces (Monier and Lindow, 2005).  
67 These communities play a critical role in enabling pathogenic bacteria to adhere to fresh  
68 produce increasing the risk of enteric disease transmission (Yaron and Römling, 2014).  
69 Bacteria within biofilms exhibit intrinsic tolerance to high concentrations of antimicrobials,  
70 biocides, and disinfectants, which complicates decontamination efforts and poses challenges  
71 for ensuring food safety. Previous studies have contributed valuable insights into the  
72 mechanisms underlying *Salmonella's* biofilm formation and its ability to persist on plants,  
73 highlighting the significance of these processes in the context of food safety and public  
74 health (Fett, 2000, Brandl, 2006, Brandl and Mandrell, 2002). However, the range of plants  
75 and conditions studied has been limited and little whole genome analysis of factors  
76 responsible for plant colonisation has been done to date.

77

78 Transposon sequencing (TnSeq) approaches have previously been used to determine the  
79 mechanisms through which bacteria survive in different environments. For example, TnSeq  
80 was used to identify the genes involved in *Pseudomonas simiae* colonisation of plant roots,  
81 which highlighted the importance of genes involved in flagella production, cell envelope  
82 biosynthesis, carbohydrate metabolism and amino acid transport and metabolism (Cole et  
83 al., 2017). We have previously used another TnSeq variant, TraDIS-*Xpress*, to identify  
84 genes involved in biofilm formation in *Escherichia coli* (Holden et al., 2021) and *Salmonella*

85 *enterica* serovar Typhimurium (Holden et al., 2022) on glass over time. TraDIS-*Xpress* builds  
86 on conventional transposon sequencing approaches by using larger denser transposon  
87 mutant libraries and by incorporating an outwards-transcribing promoter into the transposon  
88 element (Yasir et al., 2020). Induction of this promoter enables increased expression of  
89 genes downstream of transposon insertions thereby facilitating investigation into how  
90 expression, as well as gene disruption, affects survival of the mutant in a given condition.  
91 This approach also generates information about essential genes which do not tolerate  
92 insertional inactivation by transposons and can therefore not be assayed with conventional  
93 tools.

94

95 In this study, we established an alfalfa plant infection model that was used in conjunction  
96 with TraDIS-*Xpress* to investigate gene essentiality in biofilm formation on alfalfa over time.  
97 A comprehensive library of *S. Typhimurium* transposon mutants was cultivated on sprouted  
98 alfalfa plants and mutants were isolated at different stages to identify the genes involved in  
99 biofilm development *in planta* over time. Comparisons were made with data from biofilms on  
100 glass surfaces (Holden et al., 2022). This allowed for the identification of plant-specific and  
101 glass-specific mechanisms used by *S. Typhimurium* to establish in organic and inorganic  
102 surfaces, as well as conserved genes that play crucial roles on both surfaces.

103

104 We showed different sets of genes were needed for colonisation of alfalfa compared to  
105 glass, with variations in the importance of factors including flagella biosynthesis, LPS  
106 production, and stringent response regulation in biofilm development on plants.

107 Understanding the genes involved in colonisation and biofilm formation on both biotic and  
108 abiotic surfaces will provide valuable insights for the development of targeted antibacterial  
109 therapeutics to enhance food safety throughout the food processing chain.

## 110 Results

### 111 Establishment of an alfalfa plant infection model

112 To assess *S. Typhimurium*'s ability to establish and proliferate on plant hosts, an alfalfa  
113 seedling infection model was established (Figure 1). Alfalfa was chosen as an important  
114 vehicle of *Salmonella* infection and as an easily studied laboratory model. Initially, seeds  
115 underwent sterilisation and were allowed to germinate in Murashige-Skoog (MS) medium for  
116 three days (Figure 1-A). Following this germination period, the seedlings were inoculated at  
117 the root-shoot intersection with a *S. Typhimurium* strain marked either with the *lacZ* marker  
118 (*14028S::lacZ*) for blue colony selection and counting; or with a *lux* tagged strain for live  
119 visualisation on seedlings (*14028S::lux*) (see Figure 1D).

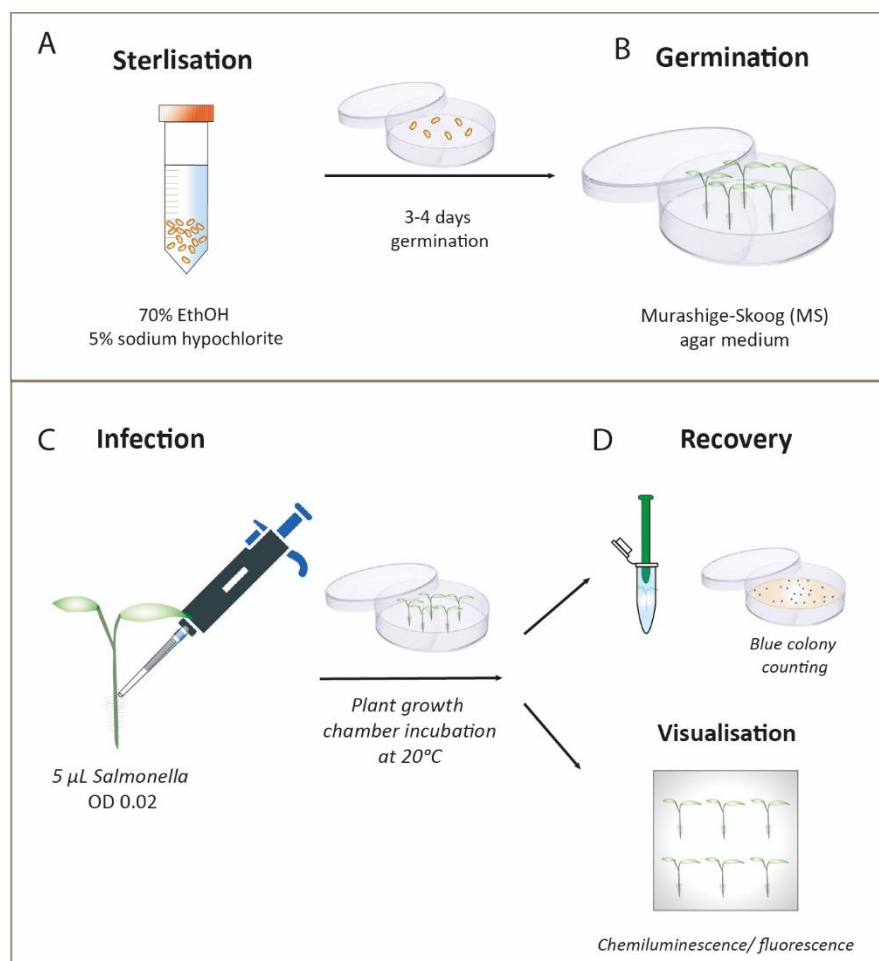

Figure 1: Alfalfa Plant Infection Model. A. Alfalfa seeds were sterilised by immersion in 70% ethanol for 30 seconds, followed by a 3-minute wash in 5% sodium hypochlorite. B. Subsequently, the sterilised seeds were left to germinate in darkness at 20°C in Murashige-Skoog (MS) agar medium for 3-4 days. C. Infection of the seedlings was performed at the root-shoot intersection using 5 µL of *Salmonella* inoculum, normalised to an optical density (OD) of 0.02. Infected seedlings were then transferred to fresh MS plates and incubated in a benchtop plant growth chamber at 20°C. D. To facilitate selection via blue colony screening, *Salmonella* recovery and quantification were performed using the *14028S::lacZ* strain after 6, 24, and 48 hours. Inoculated seedlings were homogenised by mechanical disruption using a pestle to release the bacterial cells. Cell suspensions were subjected to serial dilution and plated onto X-gal/IPTG LB plates for further analysis. Visualisation experiments were conducted using the *14028S::lux* strain to monitor the

120 *Salmonella* effectively colonises alfalfa sprouts and increases in numbers over time.

121 To investigate the effectiveness of *Salmonella* colonisation in alfalfa seedlings, a  
122 chemiluminescence-tagged strain of *Salmonella* (*14028S::lux*) was employed to infect  
123 seedlings three days after germination. Following infection, the seedlings were washed in  
124 PBS and were subsequently visualised using a Gel documentation system (Biorad). Notably,  
125 specific colonisation of the roots by *Salmonella* was observed, even from very early stages  
126 post infection (3 hours) with an evident increase in presence over time, as indicated by the  
127 chemiluminescence intensity (Figure 2A). To quantify the *Salmonella* load on the seedlings  
128 over time, a strain tagged with *lacZ* (*14028S::lacZ*) (Holden et al., 2020) was utilised to  
129 facilitate selection and counting. Cells were recovered after 8, 24, 48 and 72-hours growth,  
130 demonstrating a significant increase in *S. Typhimurium* colonisation of alfalfa over time (see  
131 Figure 2B

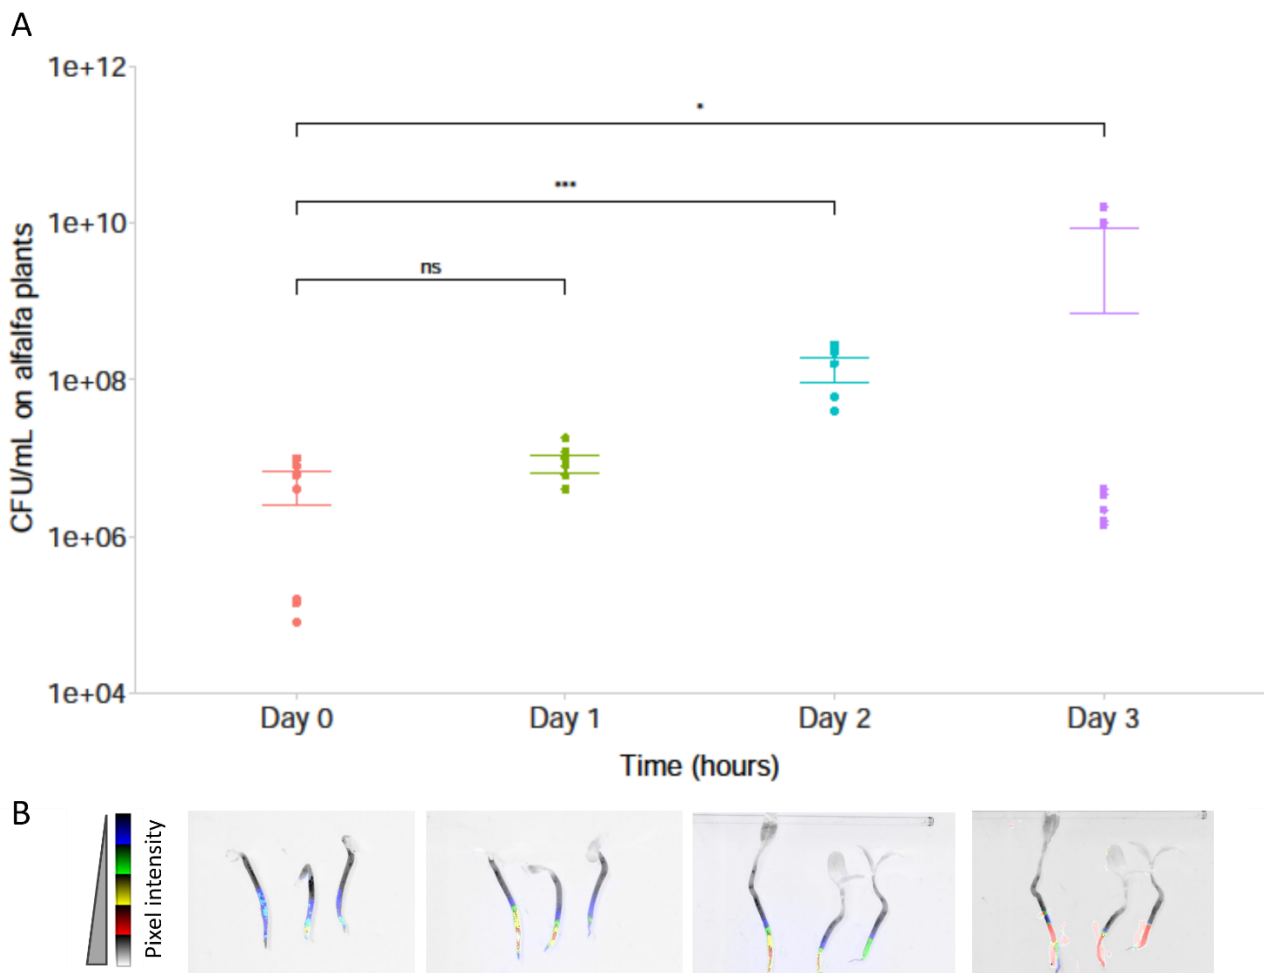

Figure 2: *Salmonella* effectively colonises the alfalfa model. A. Number of cells recovered (per seedling) of *14028S::lacZ* followed by at 8 hours, 24 hours, and 48 hours post-infection demonstrating a significant increase in *Salmonella* numbers over time. Each spot represents data from an independent replicate seedling. B. Visualisation of *14028S::lux* on alfalfa seedlings through chemiluminescence monitoring at 3 hours, 24 hours, and 48 hours post-infection, demonstrating the specific seedling colonisation by *Salmonella* over time. Chemiluminescence is depicted using five colors, with the transition from blue to red indicating higher intensity and hence cell density.

132 Genes involved in *Salmonella* establishment on alfalfa over time.

133 TraDIS-Xpress was used to identify genes involved in alfalfa colonisation by *S. Typhimurium*  
 134 over 3 days (24-, 48- and 72-hours post-seeding). These timepoints were chosen to capture  
 135 the potentially diverse mechanisms required by *Salmonella* at different stages of alfalfa  
 136 colonisation. This includes the early stages involving initial attachment and microcolony  
 137 formation (at 24 hours, representing Day 1) and the subsequent phases of establishment  
 138 and biofilm formation (spanning 48 to 72 hours, representing Day 2 and 3). We identified 69  
 139 genes as significantly involved in *S. Typhimurium* colonisation and biofilm formation on  
 140 alfalfa sprouts over time (supplementary table 1). These included genes involved in LPS  
 141 biosynthesis, DNA housekeeping, respiration and responding to stress (figure 3). Variation in  
 142 insertion frequency per gene between replicates was low, indicating minimal experimental  
 143 error (supplementary figure 1).

144

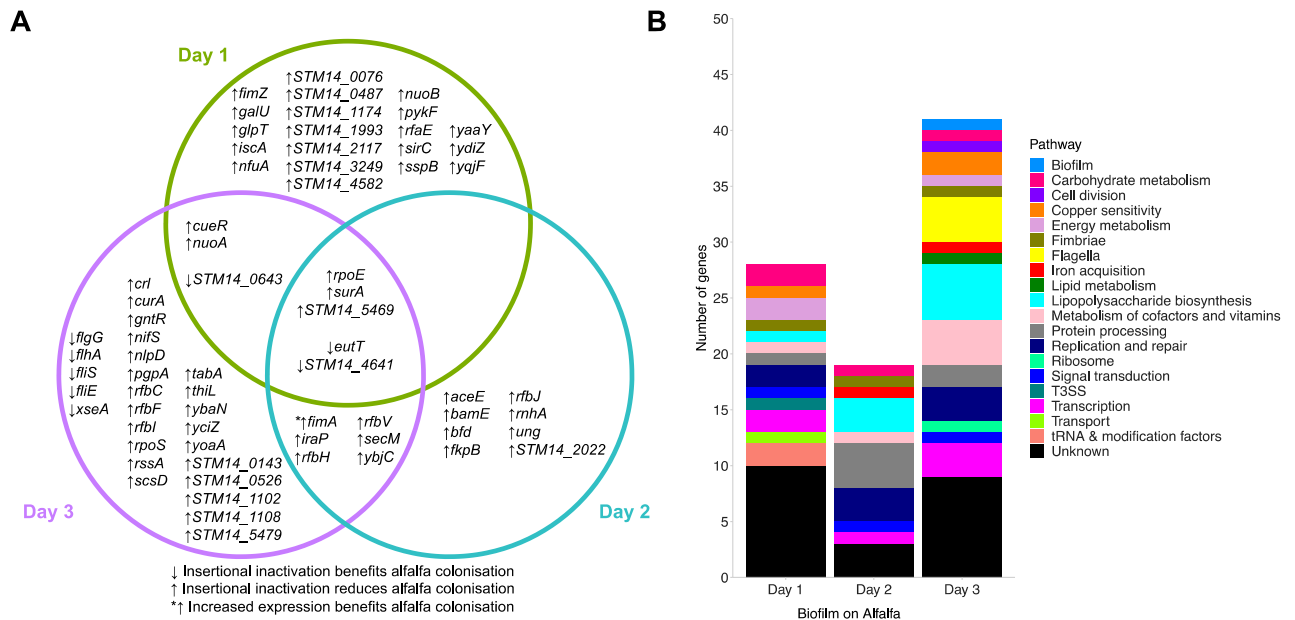

145

146 *Figure 3: A) Genes and B) pathways identified by TraDIS-Xpress to be involved in alfalfa colonisation over time.*

147 Genes involved in adhesion were identified as beneficial after 24 hours growth, including  
 148 previously reported genes, such as a negative fimbrial regulator *fimZ* (Saini et al., 2009) and  
 149 type III secretion system component *sirC* (Rakeman et al., 1999). After 48 hours, genes  
 150 involved in DNA housekeeping (*rnhA* and *ung*) (Ogawa and Okazaki, 1984, Duncan et al.,  
 151 1978),(Ogawa and Okazaki, 1984, Duncan et al., 1978), iron storage (*bfd*) (Quail et al.,  
 152 1996) and outer membrane protein assembly (*bamE*) (Sklar et al., 2007) benefitted the  
 153 further establishment of *Salmonella* on alfalfa. Following 72 hours growth, genes associated  
 154 with mature biofilm formation were identified as being important, including those with roles in  
 155 LPS O-antigen production (*rfbF*, *rfl*, *rfbC*, *rfbV* and *rfbH*) (Wang et al., 2015), flagella

156 biosynthesis (*flgG*, *flhA*, *fliS* and *fliE*) (Macnab, 1992) and responding to stress (*rpoS*, *iraP*  
157 and *crl*) (Battesti et al., 2011).  
158 Five genes were shared among all the time points tested; these were *eutT*, *surA*, *rpoE*,  
159 *STM14\_4641* and *STM14\_5469*. Loss of function of the *eut* operon through disruption of  
160 *eutT* (Penrod and Roth, 2006) was predicted to be beneficial to *S. Typhimurium*  
161 establishment at all time points tested. Transcription of the RNA-directed DNA polymerase  
162 *STM14\_4641* was detrimental to colonisation throughout its growth on alfalfa sprouts. There  
163 were fewer transposon mutants across all three days in *surA* (outer membrane protein  
164 chaperone (Lazar and Kolter, 1996)), (*rpoE* (sigma factor involved  
165 in responding to misfolded protein stress (Alba and Gross, 2004)) (Alba and Gross, 2004))  
166 and *STM14\_5469* (unknown function), which suggests these genes are beneficial  
167 throughout all stages of alfalfa colonisation.

168

#### 169 Conserved pathways crucial for biofilm formation on alfalfa sprouts and glass

170 We have previously identified genes essential for biofilm formation on glass over time using  
171 the same *S. Typhimurium* TraDIS library (Holden et al., 2022). Insertion frequencies in  
172 mutant libraries colonising glass or plant surfaces were both compared to planktonic cultures  
173 grown for the same amount of time. This acted as a standard to demonstrate where  
174 transposon insertions affected surface colonisation relative to planktonic growth, and the  
175 subsequent gene lists were then compared. This found some core pathways involved in *S.*  
176 *Typhimurium* establishment on both surfaces which included flagella biosynthesis, LPS  
177 production, respiration, iron storage and stress responses. Seven genes were found to be  
178 conserved between biofilms grown on alfalfa sprouts and on glass (figure 4). These were  
179 *nuoA* and *nuoB*, involved in synthesis of the first NADH hydrogenase in the electron  
180 transport chain (Archer and Elliott, 1995), (Archer and Elliott, 1995), fimbrial subunit *fimA* and  
181 its regulator *fimZ* (Saini et al., 2009), *rfbJ* involved in LPS O-antigen synthesis (Wang et al.,  
182 2015), *ybaN* predicted to have a role in iron acquisition (Seo et al., 2014), and stress  
183 response sigma factor *rpoS* (Gentry et al., 1993). (Gentry et al., 1993). The ethanolamine  
184 utilisation pathway played an important role in *S. Typhimurium* establishment on both alfalfa  
185 sprouts (*eutT*) and on glass (*eutQ*) at all time points tested, with disruption of each gene  
186 seen to aid colonisation. Together, this reveals a core set of pathways involved in  
187 colonisation of both biotic and abiotic surfaces.



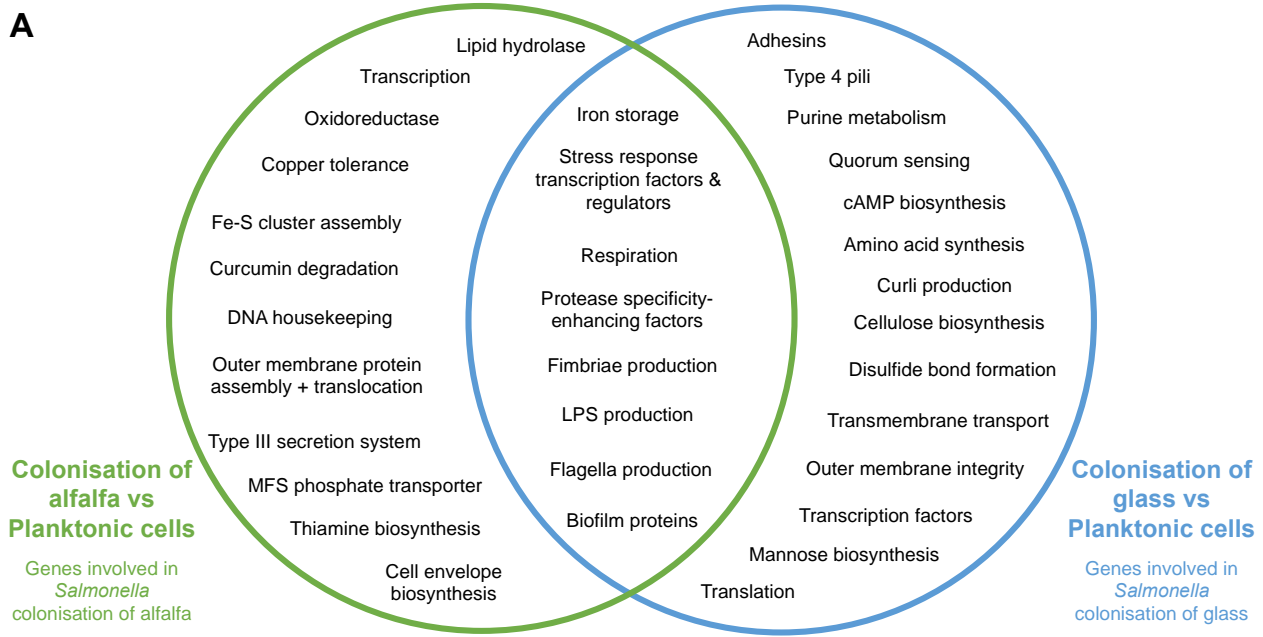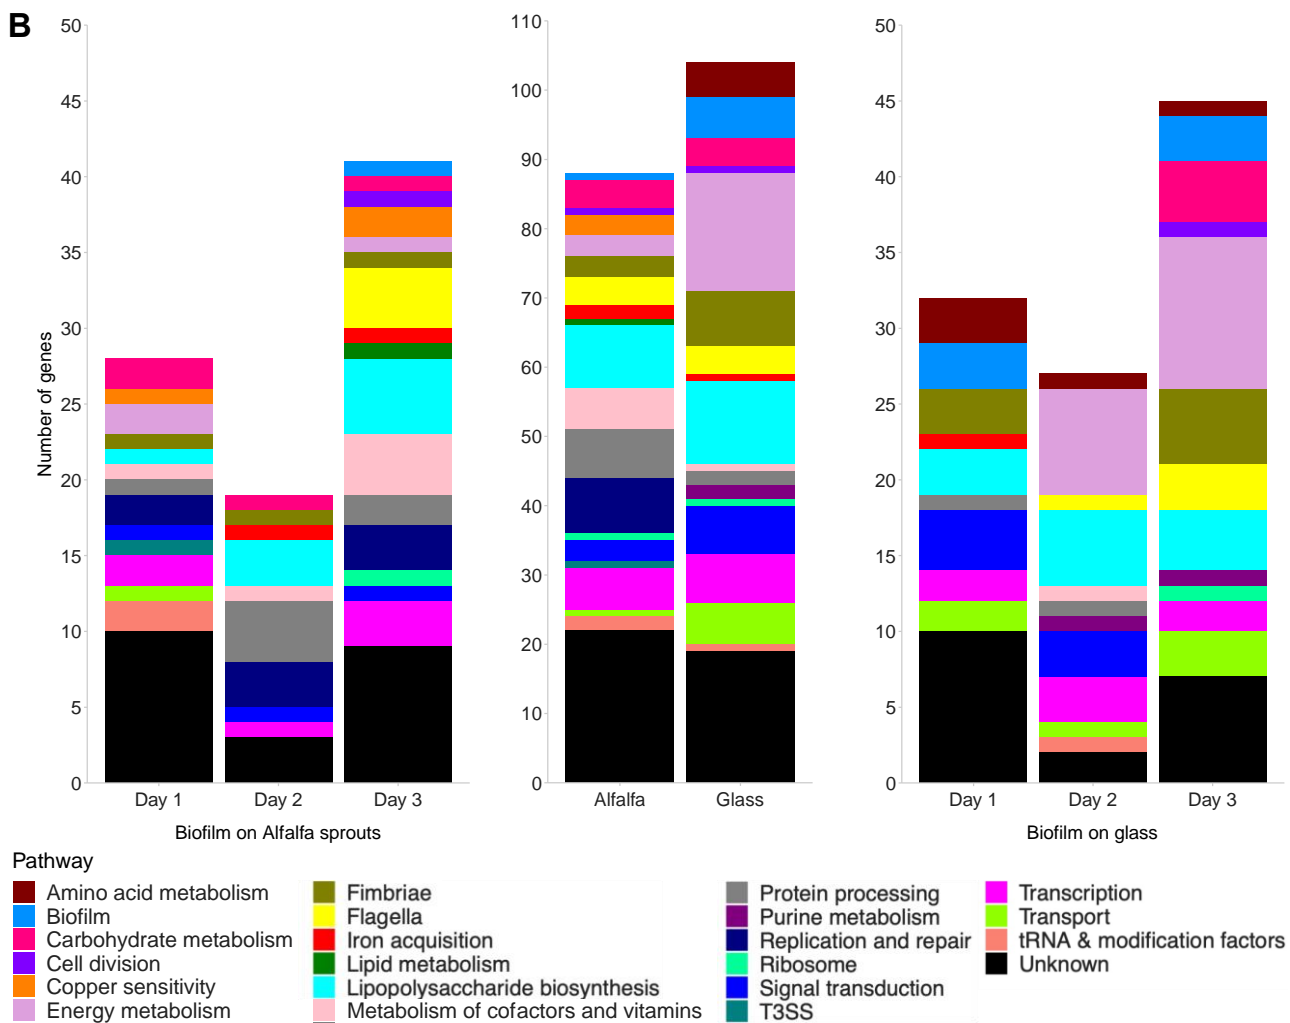

188

189 *Figure 4: A) Conserved and surface-specific pathways involved in S. Typhimurium colonisation of alfalfa sprouts*  
 190 *and glass. B) Abundance of genes in each pathway at over time for biofilms grown on alfalfa sprouts or glass*

191 Differential Flagella and Lipopolysaccharide Biosynthesis on Alfalfa vs. Glass

192 Deletion mutants were constructed in targets identified by TraDIS-*Xpress* to investigate their  
193 effects on colonisation and establishment on diverse surfaces (both inorganic and organic).  
194 These mutants were then subjected to competitive colonisation experiments with wild type *S.*  
195 *Typhimurium* strains on both glass and alfalfa surfaces. Equal numbers of mutant and wild  
196 type were inoculated onto glass beads and alfalfa plant sprouts. Subsequently, the  
197 percentage change in mutants within the recovered populations from each surface was  
198 determined over time.

199  
200 TraDIS-*Xpress* indicated that inactivation of genes involved in flagella biosynthesis was  
201 beneficial for plant colonisation after 72 hours (Figure 5A). As flagella are detected by the  
202 plant's immune system, aflagellated cells may have a competitive advantage in these  
203 communities once an immune response is raised. Our previous work found aflagellated cells  
204 were disadvantaged at colonising glass surfaces (Holden et al., 2022). To characterise the  
205 role of flagella in *S. Typhimurium* establishment on both environments, a deletion mutant of  
206 the main flagella biosynthetic regulator (*flhDC*) and a component of the flagella export  
207 machinery (*flhA*) were grown on glass and alfalfa sprouts in competition with wild type *S.*  
208 *Typhimurium*. At the initial stages of colonisation (Day 1),  $\Delta flhDC$  and  $\Delta flhA$  exhibited a  
209 significantly enhanced competitive advantage at colonising glass but were competitively  
210 disadvantaged at colonising alfalfa plants (Figure 5B). This contrasts with the prediction from  
211 the TraDIS-*Xpress* findings, however TraDIS measures competitive fitness in a large pool of  
212 competing mutants where individuals lacking flagella may benefit from adhesion of  
213 neighbouring cells whilst also being less susceptible to host immunity.

214  
215 LPS core and O-antigen biosynthesis genes were beneficial for growth on alfalfa sprouts,  
216 however the impact of different LPS biosynthesis genes on *S. Typhimurium* colonisation  
217 varied. Some exhibited beneficial effects when inactivated during glass colonisation, while  
218 others had detrimental impacts. Based on the TraDIS-*Xpress* data, *rfbJ* was beneficial for  
219 growth and establishment on alfalfa sprouts, whereas inactivation of the gene was beneficial  
220 for establishment on glass. We created a deletion mutant of *rfbJ* in *S. Typhimurium* to  
221 investigate its effect on glass and plant colonisation. Deletion of *rfbJ* resulted in reduced  
222 colonisation of both glass and plant over time (Figure 5B). This confirmed the predicted  
223 importance of this gene for adhesion and colonisation of both surfaces.

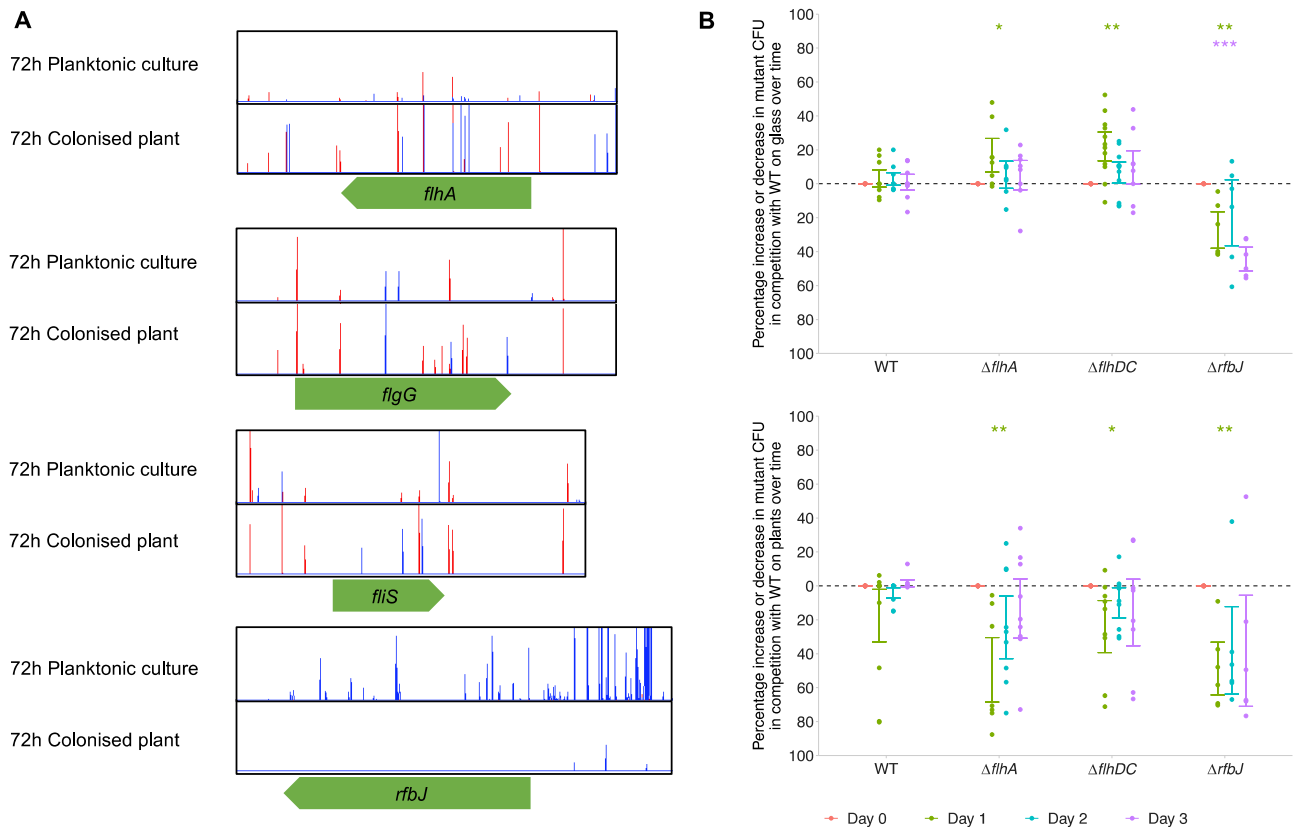

224

225 *Figure 5: A) Insertion loci and frequency in and around genes involved in flagella biosynthesis (flhA, flgG and flhS)*  
226 *and LPS O-antigen biosynthesis (rfbJ) following growth on alfalfa sprouts relative to planktonic growth. Red lines*  
227 *indicate the transposon-located promoter is facing left-to-right and blue lines indicate it is oriented right-to-left.*

228 *Images are representative of two independent replicates. B) Percentage increase or decrease in flhA, flhDC and*  
229 *rfbJ deletion mutants in biofilms formed on glass (top panel) and alfalfa plant sprouts (bottom panel) in*  
230 *competition with wild type (WT) S. Typhimurium. Points show changes in the percentage of mutant CFU relative*  
231 *to time point 0 and show 3 technical and 4 biological replicates. Error bars denote 95% confidence intervals and*  
232 *asterisks show significant differences (One-sample t-test, change from 0) of each mutant from time point 0,*  
233 *where time points are distinguished by colour: \* p < 0.05, \*\* p < 0.01, \*\*\* p < 0.001, \*\*\*\* p < 0.0001.*

234

235 Genes involved in copper tolerance, type III secretion regulation and curcumin degradation  
236 conferred a competitive advantage to Salmonella establishment on alfalfa.

237 Analysis of the TraDIS-Xpress data found pathways involved in *S. Typhimurium*

238 establishment on alfalfa plants that were not involved during biofilm formation on glass.

239 These included type III secretion regulation (*sirC*) (Rakeman et al., 1999) and Fe-S cluster  
240 assembly (*iscA*) (Vinella et al., 2009), (Vinella et al., 2009), which were beneficial at the early  
241 stages of colonisation of alfalfa, curcumin degradation (*curA*) (Hassaninasab et al., 2011)

242 was beneficial following 72 hours growth on alfalfa and copper tolerance (*cueR*) (Osman et  
243 al., 2010) was beneficial following 24 and 72 hours growth on alfalfa.

244 Gene deletion mutants were made in these genes and grown in the presence of wild type *S.*

245 *Typhimurium* on glass and alfalfa plants to investigate their effects on colonisation. Deletion

246 of *iscA* resulted in a competitive disadvantage for colonisation of both glass and alfalfa  
 247 plants, supporting the TraDIS-*Xpress* findings (figure 6B). Deletion of *cueR* caused a  
 248 competitive disadvantage in colonisation of alfalfa plants, but there was no significant  
 249 change in glass colonisation, demonstrating that expression of *cueR* is only beneficial for  
 250 colonisation of plant surfaces and not glass surfaces. There was no significant change in the  
 251 percentage of  $\Delta sirC$  or  $\Delta curA$  mutants in the biofilm over time on either glass or plants,  
 252 suggesting the effects of these genes on colonisation observed in the TraDIS-*Xpress* data  
 253 cannot be quantified by this assay.

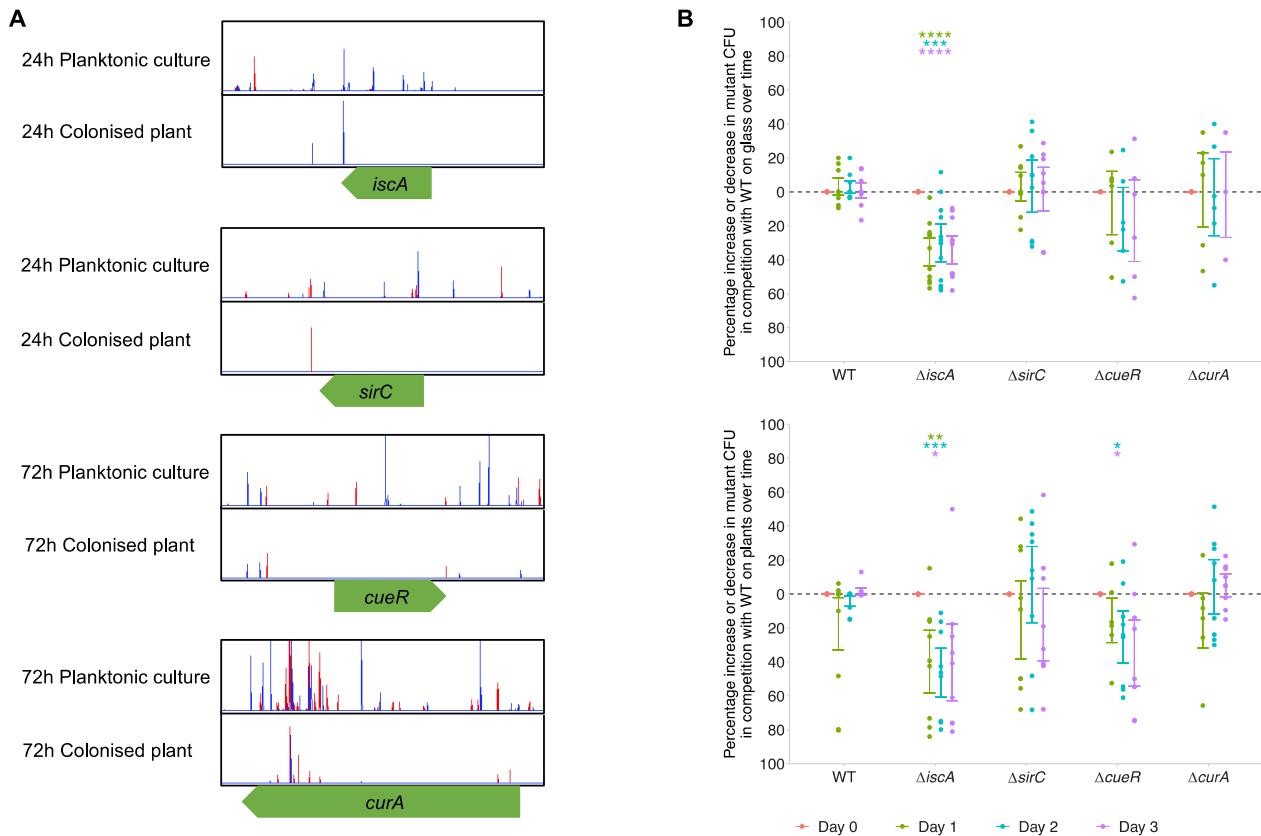

254  
 255 *Figure 6: a) Transposon insertions within and around iscA, sirC, cueR and curA in S. Typhimurium planktonic*  
 256 *culture compared to biofilms on an alfalfa plant grown for 24 or 72 hours. Lines show the insertion loci and the*  
 257 *height of the lines shows the number of reads mapped to the loci. The colour of the line indicates the orientation*  
 258 *of the promoter within the transposon: red lines denote the promoter is promoting transcription left-to-right, and*  
 259 *blue lines denote right-to-left. Plot files shown are representative of two independent replicates. b) Percentage*  
 260 *increase or decrease in iscA, sirC, cueR deletion mutants in biofilms formed on glass (top panel) and alfalfa plant*  
 261 *sprouts (bottom panel) in competition with wild type (WT) S. Typhimurium. Points show changes in the*  
 262 *percentage of mutant CFU relative to time point 0 and show 3 technical and 4 biological replicates. Error bars*  
 263 *denote 95% confidence intervals and asterisks show significant differences (One-sample t-test, change from 0) of*  
 264 *each mutant from time point 0, where time points are distinguished by colour: \* p < 0.05, \*\* p < 0.01, \*\*\* p <*  
 265 *0.001, \*\*\*\* p < 0.0001.*

## 266 Discussion

267 The primary objective of this study was to identify the mechanisms employed by *S.*  
268 *Typhimurium* to colonise effectively and establish on fresh produce and compare these to  
269 the ones required for colonisation and biofilm formation on glass, across various stages of  
270 colonisation. To achieve that, we established a fresh produce alfalfa infection model and  
271 draw a comparative analysis using genome-wide transposon sequencing (TraDIS-*Xpress*)  
272 on alfalfa, comparing them to mechanisms previously identified for biofilm formation on glass  
273 surfaces (Holden et al., 2022). Our aim was to discern the extent to which these  
274 mechanisms are universally necessary for adhesion, colonisation, and establishment on  
275 organic surfaces in contrast to inorganic ones. Our working hypothesis was that there would  
276 be both common and bespoke mechanisms important for colonisation of the two tested  
277 environments. Several key findings emerge from this study.

278  
279 We identified seven conserved genes important in *S. Typhimurium* establishment on both  
280 alfalfa sprouts and glass, highlighting these shared genes as critical for *S. Typhimurium*  
281 colonisation of diverse surfaces. These genes belong to various functional categories,  
282 including NADH hydrogenase synthesis (*nuoA* and *nuoB*), fimbrial regulation and production  
283 (*fimA* and *fimZ*), LPS O-antigen synthesis (*rfbJ*), iron acquisition (*ybaN*), and stress  
284 responses (*rpoS*). Ethanolamine utilisation genes, *eutT* and *eutQ*, were also identified to  
285 play an important role in *S. Typhimurium* establishment on both environments, with their  
286 disruption aiding colonisation of both surfaces. Notably, ethanolamine signalling has been  
287 reported to aid *S. Typhimurium* infection of mammalian cells (Srikumar and Fuchs, 2011).  
288 The identification of these conserved genes underscores their significance in surface  
289 colonisation, regardless of the surface material and shows a core requirement for different  
290 pathways providing diverse functions in colonisation to surfaces.

291  
292 There were also significant differences between the two conditions. Flagella biosynthesis  
293 was found to affect colonisation of biotic and abiotic surfaces differently in our study. We  
294 showed that aflagellated mutants ( $\Delta$ *flhDC* and  $\Delta$ *flhA*) exhibit significantly enhanced glass  
295 colonisation at the early stages of colonisation (24 hours) but perform significantly worse on  
296 alfalfa. However, with time, these mutants regain their ability to grow on alfalfa. This  
297 demonstrates the potential role of the flagellum for initial stages of adhesion to the roots. We  
298 know that flagellar motility is essential for initial host colonisation in several bacterial species  
299 (Haefele and Lindow, 1987, Van de Broek et al., 1998). This contrasts with the prediction  
300 from the TraDIS-*Xpress* results which identified the system as under selective pressure but  
301 suggested mutants would have a benefit. This highlights the complexity of the role of flagella  
302 at different stages of colonisation but also is likely to reflect the differences between

303 comparing fitness of mutants within a pool to as a monoculture where functions cannot be  
304 provided by neighbouring cells (Rossez et al., 2015).

305 We also found pathways involved in *S. Typhimurium* establishment on alfalfa seedlings that  
306 were not involved in biofilm formation on glass. Notably, genes related to type III secretion  
307 regulation (*sirC*), Fe-S cluster assembly (*iscA*), curcumin degradation (*curA*), and copper  
308 tolerance (*cueR*) confer a competitive advantage to *S. Typhimurium* during colonisation of  
309 alfalfa. Deletion of *cueR* reduced the ability of *S. Typhimurium* to colonise plants but had no  
310 effect on glass, demonstrating a conditional importance between surfaces. Metals play an  
311 important role in plant-pathogen interactions (Fones and Preston, 2013) with copper being  
312 commonly deployed as a host antimicrobial. Regulating the expression of copper export  
313 through *cueR* is clearly beneficial for colonisation and establishment on a plant. Deletion of  
314 *iscA* reduced colonisation of both glass and plant surfaces, and there was no difference in  
315 colonisations seen in  $\Delta$ *sirC* or  $\Delta$ *curA* deletion mutants. TraDIS-*Xpress* can determine very  
316 small changes in competitive fitness that may not always be seen in culture-based assays,  
317 therefore further characterisation is needed to determine how these genes affect plant  
318 colonisation.

319

320 In conclusion, this research provides a comprehensive understanding of the genetic  
321 determinants that influence *S. Typhimurium* colonisation and establishment on diverse  
322 surfaces. The findings emphasise the role of specific genes mediating adhesion, metal  
323 tolerance and stress responses in different stages of *S. Typhimurium* colonisation of fresh  
324 produce. This knowledge advances our understanding of *Salmonella* pathogenesis and host-  
325 microbe interactions and may have implications for controlling *Salmonella* colonisation and  
326 infection.

## 327 **Materials and Methods**

### 328 Alfalfa seed sterilisation and germination

329 Alfalfa seeds were sterilised by immersion in a Falcon tube containing 20 mL of 70% ethanol  
330 for 30 seconds, followed by three sequential rinses with 20 mL sterile water. Subsequently,  
331 the seeds were treated with 5% sodium hypochlorite (20 mL) for 3 minutes on a rolling  
332 platform. Three subsequent washes in water were carried out. For germination, sterilised  
333 seeds were transferred to square agar plates (20 mL) containing Murashige-Skoog (MS)  
334 agar medium. These seeds were positioned with sufficient spacing to allow for three days of  
335 germination, reaching an approximate size of 1 cm. Following germination, the seedlings  
336 were transferred to fresh MS plates and infected with *S. Typhimurium* strain. Adequate  
337 seedlings were included in the process to enable replication for experimental purposes.

### 338 Visualisation of *Salmonella* on alfalfa seedlings

340 Three-day-old alfalfa seedlings were infected with *S. Typhimurium* tagged with the *lux*  
341 operon (*14028S::lux*). A total of 20  $\mu$ L was evenly distributed in two separate applications  
342 along the roots, ensuring even distribution, with the bacterial density normalized to an optical  
343 density (OD<sub>600nm</sub>) of 0.2. The seedlings were incubated at 20°C throughout the  
344 experiment's duration. Visual assessments were conducted at multiple time points following  
345 infection, specifically at 3 hours, 24 hours, 48 hours, and 72 hours post-infection. The Biorad  
346 Gel Documentation system (ChemiDoc™ MP) was used to capture chemiluminescence, and  
347 in addition to this, a colorimetric image was captured and superimposed over the  
348 luminescent image for a comprehensive analysis of *S. Typhimurium* presence on the  
349 seedlings. Images were analysed using ImageJ by generating merged channel images.  
350 Increase in pixel intensity is indicated by change in colour from blue to red, indicating higher  
351 cell density of the *14028S::lux* strain.

### 352 Competition assays on glass and on alfalfa seedlings

354 For competition in alfalfa seedlings, three-day-old seedlings were infected with 10  $\mu$ L of *S.*  
355 *Typhimurium* tagged with *lacZ* (*14028S::lacZ*) in a 1:1 ratio with deletion mutants, all  
356 adjusted to a final OD of 0.02 in 10mM MgCl<sub>2</sub>. Infected seedlings were subsequently  
357 transferred to fresh MS plates and incubated at 20°C. After 24, 48, and 72 hours post-  
358 infection, three seedlings per timepoint were homogenised using a plastic pestle in PBS and  
359 then serially diluted in PBS. The dilutions were spotted on LB-agar plates supplemented with  
360 40  $\mu$ g/ml X-gal (-Bromo-4-chloro-3-indolyl  $\beta$ -D-galactopyranoside) and 1mM IPTG (Isopropyl  
361  $\beta$ -D-1-thiogalactopyranoside).  
362 For competition on glass beads, glass beads suspended in 5 mL of LB-NaCl were inoculated  
363 with 50  $\mu$ L of selected strains mixed with *14028S::lacZ* in a 1:1 ratio, normalized to a final

364 OD of 0.02. After incubation, three beads were recovered at 24, 48, and 72 hours, washed in  
365 PBS to eliminate planktonic growth, and the biofilm cells were recovered by vortexing in  
366 PBS. The recovered cells were serially diluted and spotted on LB agar plates supplemented  
367 with 40 µg/ml X-gal and 1mM IPTG.

#### 368 Salmonella cell recovery from alfalfa

369 To perform cell counting, a *S. Typhimurium* strain tagged with *lacZ* (*14028S::lacZ*) (Holden  
370 et al., 2020) was used. Seedlings were infected with this strain following the previously  
371 described procedure. Cell isolation was carried out at 6 hours, 24 hours, 48 hours, and 72  
372 hours post-infection. For each time point, three seedlings were processed. Individual  
373 seedlings were homogenised in 500 µL of sterile PBS using a plastic pestle. The resulting  
374 samples underwent serial dilution, and these dilutions were plated on lysogeny broth (LB)  
375 agar plates. These plates were supplemented with 40 µg/mL X-Gal and 1 mM IPTG to allow  
376 blue-white screening of colonies. The prepared plates were incubated at 37°C overnight.  
377 Following overnight incubation, colony-forming units (CFU) were counted to give a measure  
378 of bacterial load per seedling. Each time point included at least three technical replicates and  
379 three biological samples, ensuring robust and reliable quantification of *S. Typhimurium*  
380 populations.

381

#### 382 TraDIS-Xpress library preparation, sequencing and data analysis

383 Three-day-old alfalfa seedlings, grown on MS agar, were infected at the shoot-root junction  
384 with a 5 µL droplet of a *S. Typhimurium* transposon mutant library (described by Holden et  
385 al. (2022), normalised to an OD<sub>600nm</sub> of 0.01 with 1 mM IPTG to induce transcription from the  
386 transposon-located promoter. Seedlings were then allowed to grow at 30 °C before sampling  
387 following 24, 48 and 72 hours growth. Ten seedlings were processed per timepoint and were  
388 homogenised in 1 mL of sterile PBS using a plastic pestle. Samples were filtered through 5  
389 µm syringe filters to isolate bacterial cells and eliminate plant cell contamination. Genomic  
390 DNA was extracted from these cells following the protocol described by Trampari et al.  
391 (2021) Genomic DNA was extracted from these cells following the protocol described by  
392 Trampari et al. (2021). A Museek DNA fragment library preparation kit (ThermoFisher) was  
393 used to tagment genomic DNA and was then purified with AMPure XP beads (Beckman  
394 Coulter). DNA fragments were amplified using customised primers that anneal to the  
395 tagmented ends and biotinylated primers that anneal to the transposon. These PCR  
396 products were purified as previously and biotinylated DNA was incubated for 4 hours with  
397 streptavidin beads (Dynabeads® kilobaseBINDER™, Invitrogen) to capture only DNA  
398 fragments containing the transposon. These fragments were amplified using barcoded  
399 sequencing primers that anneal to the tagmented ends and to the transposon (Yasir et al.,  
400 2020). DNA fragments were then purified and size-selected using AMPure beads. Fragment



401 length was quantified using a TapeStation (Aligent) and sequenced on a NextSeq500 using  
402 the NextSeq 500/550 High Output Kit v2.5 with 75 cycles.

403 Fastq files were aligned to the *S. Typhimurium* 14028S reference genome (CP001363,  
404 modified to include chromosomally integrated *lacZ*) using BioTraDIS (version 1.4.3)  
405 (Barquist et al., 2016). Significant differences ( $p < 0.05$ , after correction for false discovery)  
406 in insertion frequencies between planktonic and biofilm conditions at each time point were  
407 found using BioTraDIS and AlbaTraDIS (version 1.0.1) (Page et al., 2019).

#### 408 Mutant creation and phenotypic validation

409 The luminescent *S. Typhimurium* strain tagged with *lux* was created following the gene  
410 doctoring protocol (Lee et al., 2009) using vectors created by Holden et al. (2020). Single  
411 gene deletion mutants were made following the gene doctoring protocol. The luminescent *S.*  
412 *Typhimurium* strain tagged with *lux* was created following the gene doctoring protocol (Lee  
413 et al., 2009) using vectors created by Holden et al. (2020). Single gene deletion mutants  
414 were made following the gene doctoring protocol (Lee et al., 2009) using plasmids  
415 constructed via Golden Gate assembly (Thomson et al., 2020). Mutants were validated by  
416 whole genome sequencing to confirm loss of the gene of interest. Primers for mutant  
417 construction are listed in supplementary table 2.

## 418 References

- 419 ALBA, B. M. & GROSS, C. A. 2004. Regulation of the *Escherichia coli* sigma-dependent  
420 envelope stress response. *Mol Microbiol*, 52, 613-9.
- 421 ARCHER, C. D. & ELLIOTT, T. 1995. Transcriptional control of the nuo operon which  
422 encodes the energy-conserving NADH dehydrogenase of *Salmonella typhimurium*.  
423 *Journal of bacteriology*, 177, 2335-2342.
- 424 BARQUIST, L., MAYHO, M., CUMMINS, C., CAIN, A. K., BOINETT, C. J., PAGE, A. J.,  
425 LANGRIDGE, G. C., QUAIL, M. A., KEANE, J. A. & PARKHILL, J. 2016. The TraDIS  
426 toolkit: sequencing and analysis for dense transposon mutant libraries.  
427 *Bioinformatics*, 32, 1109-11.
- 428 BATTESTI, A., MAJDALANI, N. & GOTTESMAN, S. 2011. The RpoS-Mediated General  
429 Stress Response in *Escherichia coli*. *Annual Review of Microbiology*, 65, 189-213.
- 430 BRANDL, M. T. 2006. Fitness of Human Enteric Pathogens on Plants and Implications for  
431 Food Safety. *Annual Review of Phytopathology*, 44, 367-392.
- 432 BRANDL, M. T. & MANDRELL, R. E. 2002. Fitness of *Salmonella enterica* serovar  
433 Thompson in the Cilantro Phyllosphere. *Applied and Environmental Microbiology*, 68,  
434 3614-3621.
- 435 BRENNAN, F. P., ALSANIUS, B. W., ALLENDE, A., BURGESS, C. M., MOREIRA, H.,  
436 JOHANNESSEN, G. S., CASTRO, P. M. L., UYTENDAELE, M., TRUCHADO, P. &  
437 HOLDEN, N. J. 2022. Harnessing agricultural microbiomes for human pathogen  
438 control. *ISME Communications*, 2, 44.
- 439 COLE, B. J., FELTCHER, M. E., WATERS, R. J., WETMORE, K. M., MUCYN, T. S., RYAN,  
440 E. M., WANG, G., UL-HASAN, S., MCDONALD, M., YOSHIKUNI, Y., MALMSTROM,  
441 R. R., DEUTSCHBAUER, A. M., DANGL, J. L. & VISEL, A. 2017. Genome-wide  
442 identification of bacterial plant colonization genes. *PLOS Biology*, 15, e2002860.
- 443 DUNCAN, B. K., ROCKSTROH, P. A. & WARNER, H. R. 1978. *Escherichia coli* K-12  
444 mutants deficient in uracil-DNA glycosylase. *J Bacteriol*, 134, 1039-45.
- 445 EFSA, PREVENTION, E. C. F. D. & CONTROL 2017. The European Union summary report  
446 on trends and sources of zoonoses, zoonotic agents and food-borne outbreaks in  
447 2016. *EFSA Journal*, 15, e05077.
- 448 FETT, W. F. 2000. Naturally Occurring Biofilms on Alfalfa and Other Types of Sprouts.  
449 *Journal of Food Protection*, 63, 625-632.
- 450 FONES, H. & PRESTON, G. M. 2013. The impact of transition metals on bacterial plant  
451 disease. *FEMS Microbiology Reviews*, 37, 495-519.
- 452 GENTRY, D. R., HERNANDEZ, V. J., NGUYEN, L. H., JENSEN, D. B. & CASHEL, M. 1993.  
453 Synthesis of the stationary-phase sigma factor  $\sigma$  is positively regulated by ppGpp. *J*  
454 *Bacteriol*, 175, 7982-9.
- 455 HAEFELE, D. M. & LINDOW, S. E. 1987. Flagellar Motility Confers Epiphytic Fitness  
456 Advantages upon *Pseudomonas syringae*. *Applied and Environmental Microbiology*,  
457 53, 2528-2533.
- 458 HASSANINASAB, A., HASHIMOTO, Y., TOMITA-YOKOTANI, K. & KOBAYASHI, M. 2011.  
459 Discovery of the curcumin metabolic pathway involving a unique enzyme in an  
460 intestinal microorganism. *Proc Natl Acad Sci U S A*, 108, 6615-20.
- 461 HEATON, J. C. & JONES, K. 2008. Microbial contamination of fruit and vegetables and the  
462 behaviour of enteropathogens in the phyllosphere: a review. *Journal of Applied*  
463 *Microbiology*, 104, 613-626.
- 464 HOLDEN, E. R., WICKHAM, G. J., WEBBER, M. A., THOMSON, N. M. & TRAMPARI, E.  
465 2020. Donor plasmids for phenotypically neutral chromosomal gene insertions in  
466 *Enterobacteriaceae*. *Microbiology*.
- 467 HOLDEN, E. R., YASIR, M., TURNER, A. K., CHARLES, I. G. & WEBBER, M. A. 2022.  
468 Comparison of the genetic basis of biofilm formation between *Salmonella*  
469 Typhimurium and *Escherichia coli*. *Microbial Genomics*, 8.

- 470 HOLDEN, E. R., YASIR, M., TURNER, A. K., WAIN, J., CHARLES, I. G. & WEBBER, M. A.  
471 2021. Massively parallel transposon mutagenesis identifies temporally essential  
472 genes for biofilm formation in *Escherichia coli*. *Microb Genom*, 7.  
473 HUMPHREY, T. 2004. Salmonella, stress responses and food safety. *Nature Reviews*  
474 *Microbiology*, 2, 504-509.  
475 ISLAM, M., MORGAN, J., DOYLE, M. P., PHATAK, S. C., MILLNER, P. & JIANG, X. 2004.  
476 Fate of *Salmonella enterica* Serovar Typhimurium on Carrots and Radishes Grown in  
477 Fields Treated with Contaminated Manure Composts or Irrigation Water. *Applied and*  
478 *Environmental Microbiology*, 70, 2497-2502.  
479 LAUNDERS, N., LOCKING, M. E., HANSON, M., WILLSHAW, G., CHARLETT, A.,  
480 SALMON, R., COWDEN, J. & ADAK, G. K. 2016. A large Great Britain-wide outbreak  
481 of STEC O157 phage type 8 linked to handling of raw leeks and potatoes.  
482 *Epidemiology & Infection*, 144, 171-181.  
483 LAZAR, S. W. & KOLTER, R. 1996. SurA assists the folding of *Escherichia coli* outer  
484 membrane proteins. *J Bacteriol*, 178, 1770-3.  
485 LEE, D. J., BINGLE, L. E., HEURLIER, K., PALLEN, M. J., PENN, C. W., BUSBY, S. J. &  
486 HOBMAN, J. L. 2009. Gene doctoring: a method for recombineering in laboratory  
487 and pathogenic *Escherichia coli* strains. *BMC Microbiol*, 9, 252.  
488 MACNAB, R. M. 1992. Genetics and biogenesis of bacterial flagella. *Annu Rev Genet*, 26,  
489 131-58.  
490 MONIER, J. M. & LINDOW, S. E. 2005. Aggregates of Resident Bacteria Facilitate Survival  
491 of Immigrant Bacteria on Leaf Surfaces. *Microbial Ecology*, 49, 343-352.  
492 OGAWA, T. & OKAZAKI, T. 1984. Function of RNase H in DNA replication revealed by  
493 RNase H defective mutants of *Escherichia coli*. *Mol Gen Genet*, 193, 231-7.  
494 OSMAN, D., WALDRON, K. J., DENTON, H., TAYLOR, C. M., GRANT, A. J., MASTROENI,  
495 P., ROBINSON, N. J. & CAVET, J. S. 2010. Copper homeostasis in Salmonella is  
496 atypical and copper-CueP is a major periplasmic metal complex. *J Biol Chem*, 285,  
497 25259-68.  
498 PAGE, A. J., BASTKOWSKI, S., YASIR, M., TURNER, A. K., LE VIET, T., SAVVA, G. M.,  
499 WEBBER, M. A. & CHARLES, I. G. 2019. AlbaTraDIS: Comparative analysis of large  
500 datasets from parallel transposon mutagenesis experiments. *bioRxiv*, 593624.  
501 PENROD, J. T. & ROTH, J. R. 2006. Conserving a Volatile Metabolite: a Role for  
502 Carboxysome-Like Organelles in *Salmonella enterica*. *Journal of Bacteriology*, 188,  
503 2865-2874.  
504 QUAIL, M. A., JORDAN, P., GROGAN, J. M., BUTT, J. N., LUTZ, M., THOMSON, A. J.,  
505 ANDREWS, S. C. & GUEST, J. R. 1996. Spectroscopic and voltammetric  
506 characterisation of the bacterioferritin-associated ferredoxin of *Escherichia coli*.  
507 *Biochem Biophys Res Commun*, 229, 635-42.  
508 RAKEMAN, J. L., BONIFIELD, H. R. & MILLER, S. I. 1999. A HilA-Independent Pathway to  
509 *Salmonella typhimurium* Invasion Gene Transcription. *Journal of Bacteriology*, 181,  
510 3096-3104.  
511 ROSSEZ, Y., WOLFSON, E. B., HOLMES, A., GALLY, D. L. & HOLDEN, N. J. 2015.  
512 Bacterial Flagella: Twist and Stick, or Dodge across the Kingdoms. *PLOS*  
513 *Pathogens*, 11, e1004483.  
514 SAINI, S., PEARL, J. A. & RAO, C. V. 2009. Role of FimW, FimY, and FimZ in Regulating  
515 the Expression of Type I Fimbriae in *Salmonella enterica* Serovar Typhimurium.  
516 *Journal of Bacteriology*, 191, 3003-3010.  
517 SALAZAR, J. K., DENG, K., TORTORELLO, M. L., BRANDL, M. T., WANG, H. & ZHANG,  
518 W. 2013. Genes *ycfR*, *sirA* and *yigG* Contribute to the Surface Attachment of  
519 *Salmonella enterica* Typhimurium and Saintpaul to Fresh Produce. *PLOS ONE*, 8,  
520 e57272.  
521 SEO, S. W., KIM, D., LATIF, H., O'BRIEN, E. J., SZUBIN, R. & PALSSON, B. O. 2014.  
522 Deciphering Fur transcriptional regulatory network highlights its complex role beyond  
523 iron metabolism in *Escherichia coli*. *Nature Communications*, 5, 4910.

- 524 SKLAR, J. G., WU, T., GRONENBERG, L. S., MALINVERNI, J. C., KAHNE, D. & SILHAVY,  
525 T. J. 2007. Lipoprotein SmpA is a component of the YaeT complex that assembles  
526 outer membrane proteins in *Escherichia coli*. *Proc Natl Acad Sci U S A*, 104, 6400-5.  
527 SRIKUMAR, S. & FUCHS, T. M. 2011. Ethanolamine Utilization Contributes to Proliferation  
528 of *Salmonella enterica* Serovar Typhimurium in Food and in Nematodes. *Applied and*  
529 *Environmental Microbiology*, 77, 281-290.  
530 THOMSON, N. M., ZHANG, C., TRAMPARI, E. & PALLEN, M. J. 2020. Creation of Golden  
531 Gate constructs for gene doctoring. *BMC Biotechnology*, 20, 54.  
532 TRAMPARI, E., HOLDEN, E. R., WICKHAM, G. J., RAVI, A., MARTINS, L. D. O., SAVVA,  
533 G. M. & WEBBER, M. A. 2021. Exposure of *Salmonella* biofilms to antibiotic  
534 concentrations rapidly selects resistance with collateral tradeoffs. *npj Biofilms and*  
535 *Microbiomes*, 7, 3.  
536 VAN DE BROEK, A., LAMBRECHT, M. & VANDERLEYDEN, J. 1998. Bacterial chemotactic  
537 motility is important for the initiation of wheat root colonization by *Azospirillum*  
538 *brasilense*. *Microbiology*, 144, 2599-2606.  
539 VINELLA, D., BROCHIER-ARMANET, C., LOISEAU, L., TALLA, E. & BARRAS, F. 2009.  
540 Iron-sulfur (Fe/S) protein biogenesis: phylogenomic and genetic studies of A-type  
541 carriers. *PLoS Genet*, 5, e1000497.  
542 WANG, Z., WANG, J., REN, G., LI, Y. & WANG, X. 2015. Influence of Core Oligosaccharide  
543 of Lipopolysaccharide to Outer Membrane Behavior of *Escherichia coli*. *Marine*  
544 *Drugs*, 13, 3325-3339.  
545 YARON, S. & RÖMLING, U. 2014. Biofilm formation by enteric pathogens and its role in  
546 plant colonization and persistence. *Microbial Biotechnology*, 7, 496-516.  
547 YASIR, M., TURNER, A. K., BASTKOWSKI, S., BAKER, D., PAGE, A. J., TELATIN, A.,  
548 PHAN, M. D., MONAHAN, L., SAVVA, G. M., DARLING, A., WEBBER, M. A. &  
549 CHARLES, I. G. 2020. TraDIS-Xpress: a high-resolution whole-genome assay  
550 identifies novel mechanisms of triclosan action and resistance. *Genome Res*.
